# Supplementary material for: SEPTIN2 and STATHMIN Regulate CD99-Mediated Cellular Differentiation in Hodgkin's Lymphoma
Source: PLoS One. 2015 May 22;10(5):e0127568. doi: 10.1371/journal.pone.0127568 (PMC4441373; doi:10.1371/journal.pone.0127568)
Supplement: S2 Table — (XLSX) [file pone.0127568.s005.xlsx]

## Sheet: Sheet1
S2 Table Primers used in qRT-PCR analysis
Gene	Primer
septin2 forward	5'-TGACGAGAGCGGCTTGAACAG-3'
septin2 reverse	5'-GGCGGCCTCTGACCTTCTTT-3'
stathmin forward	5'-AAAATGGAGGCTAACAAAGAGAAAC-3'
stathmin reverse	5'-AGGGAGGAAAAAGTAAATGACACTG-3'
GAPDH forward	5'-GCTGAGTATGTCGTGGAGTCT-3'
GAPDH reverse	5'-GTTCACACCCATCACAAACAT-3'
