# Supplementary material for: SEPTIN2 and STATHMIN Regulate CD99-Mediated Cellular Differentiation in Hodgkin's Lymphoma
Source: PLoS One. 2015 May 22;10(5):e0127568. doi: 10.1371/journal.pone.0127568 (PMC4441373; doi:10.1371/journal.pone.0127568)
Supplement: S7 Table — (XLSX) [file pone.0127568.s010.xlsx]

## Sheet: Sheet1
S7 Table The differential proteins indentified by MS between A20-mCD99L2- versus A20-CTR
NOa	Accession	gene	Protein name	Ratiob	T test	Score	Mass	Queries matched	Peptide	Ppm	Rank
A3	O70400	PDLI1_MOUSE	PDZ and LIM domain protein 1	2.86	0.0068	68	36208	1	R.VTPPEGYDVVTVFRE.-	18.2	1
A6	Q6TMK6	GBB1_MOUSE	Guanine nucleotide-binding protein G(I)/G(S)/G(T) subunit beta-1	3.06	0.018	35	38192	1	K.IYAMHWGTDSR.L	17.3	1
A8	P42208	SEPT2_MOUSE	Septin-2	3.17	0.00047	58	41727	1	K.STLINSLFLTDLYPER.I	28	1
A15	P62629	EF1A1_MOUSE	Elongation factor 1-alpha 1	2.64	0.0011	56	50424	1	K.YYVTIIDAPGHR.D	38.3	1
A16	Q8BMP6	GCP60_MOUSE	Golgi resident protein GCP60	3.72	0.0014	44	60372	1	R.DCHEEVYAGSHQYPGR.G	45	1
B1	Q9QZD9	EIF3I_MOUSE	Eukaryotic translation initiation factor 3 subunit 1	-2.96	0.012	331	36837	4	K.GHFGPINSVAFHPDGK.S	7.38	1
B2	Q71FK5	ACTB_CAVPO	Actin, cytoplasmic 1	-1.95	0.001	186	42052	3	K.SYELPDGQVITIGNER.F	20.8	1
A23	P60710	ACTB_MOUSE	Actin, cytoplasmic 1	2.31	0.043	199	42052	4	K.SYELPDGQVITIGNER.F	30.8	1
B3	P60710	ACTB_MOUSE	Actin, cytoplasmic 1	-2.12	0.076	151	42052	4	K.SYELPDGQVITIGNER.F	17.6	1
B4	P60710	ACTB_MOUSE	Actin, cytoplasmic 1	-2.87	0.02	143	42052	3	K.SYELPDGQVITIGNER.F	24.6	1
B5	P29758	OAT_MOUSE	Ornithine aminotransferase, mitochondrial	-3.61	0.0034	368	48723	2	R.HQVLFIADEIQTGLAR.T	26.2	1
B6	Q9JLZ6	HIC2_MOUSE	Hypermethylated in cancer 2 protein	-2.42	0.0071	65	73710	1	K.QLLLQLNQQR.A	30.1	1
B13	Q9R1P4	PSA1_MOUSE	Proteasome subunit alpha type-1	-1.97	0.036	115	29813	2	R.NQYDNDVTVWSPQGR.I	43.8	1
A2	P17182	ENOA_MOUSE	Alpha-enolase	3.31	0.00032	261	47453	2	R.AAVPSGASTGIYEALELR.D	-27.95	1
A31	P17182	ENOA_MOUSE	Alpha-enolase	1.7	0.056	214	47453	3	R.AAVPSGASTGIYEALELR.D	13.3	1
A9	P07724	ALBU_MOUSE	Serum albumin	2.82	0.0027	81	70700	1	K.LGEYGFQNAILVR.Y	-14.91	1
A10	P07724	ALBU_MOUSE	Serum albumin	4.56	0.00021	62	70700	1	K.LGEYGFQNAILVR.Y	-6.62	1
A13	P61979	HNRPK_MOUSE	Heterogeneous nuclear ribonucleoprotein K	1.67	0.039	104	51230	3	R.NLPLPPPPPPR.G	-4.41	1
B9	P61979	HNRPK_MOUSE	Heterogeneous nuclear ribonucleoprotein K	-1.95	0.035	65	51230	3	R.NLPLPPPPPPR.G	-7.18	1
A14	Q3UEB3	PUF60_MOUSE	Poly(U)-binding-splicing factor	1.73	0.064	46	60382	1	R.VYVGSIYYELGEDTIR.Q	7.81	1
A20	Q3TB92	MCA32_MOUSE	Mast cell antigen 32	2.63	0.045	58	27805	6	K.LNIPTTNVFANR.L	14.3	1
A30	Q3TB92	MCA32_MOUSE	Mast cell antigen 32	3.12	0.028	62	27805	8	K.FCGVEAAVSEMTR.R	22.2	1
A22	Q9D819	IPYR_MOUSE	Inorganic pyrophosphatase	2.89	0.022	199	33102	4	R.LKPGYLEATVDWFR.R	26.1	1
A24	P63073	IF4E_MOUSE	Eukaryotic translation initiation factor 4E	2.31	0.039	99	25266	5	K.IVIGYQSHADTATK.S	27.8	1
A25	P70296	PEBP1_MOUSE	Phosphatidylethanolamine-binding protein 1	1.99	0.042	168	20988	3	K.GNDISSGTVLSDYVGSGPPSGTGLHR.Y	-27.09	1
A26	Q61171	PRDX2_MOUSE	Peroxiredoxin-2	2.69	0.012	75	21936	1	R.QITVNDLPVGR.S	-24.54	1
A27	Q9R1P1	PSB3_MOUSE	Proteasome subunit beta type-3	3.72	0.0015	241	23235	3	R.LYIGLAGLATDVQTVAQR.L	-14.36	1
A28	P54227	STMN1_MOUSE	Stathmin	1.99	0.0044	156	17264	2	R.ASGQAFELILSPR.S	-11.49	1
A29	Q9D3D9	ATPD_MOUSE	ATP synthase subunit delta, mitochondrial	1.84	0.011	55	17589	1	K.AQSELSGAADEAAR.A	-5.51	1
B7	P62814	VATB2_MOUSE	V-type proton ATPase subunit B, brain isoform	-2.41	0.034	213	56857	5	R.TVYETLDIGWQLLR.I	27.5	1
B8	P42932	TCPQ_MOUSE	T-complex protein 1 subunit theta	-2.57	0.047	185	60088	4	K.HFSGLEEAVYR.N	1.46	1
B10	P63038	CH60_MOUSE	60 kDa heat shock protein, mitochondrial	-2.44	0.0046	163	61088	2	R.AAVEEGIVLGGGCALLR.C	-1.59	1
B11	P17918	PCNA_MOUSE	Proliferating cell nuclear antigen	-2.93	0.038	60	29108	2	R.SEGFDTYR.C	-14.58	1
B12	Q61937	NPM_MOUSE	Nucleophosmin	-2.73	0.0037	100	32711	2	K.VDNDENEHQLSLR.T	-1.08	1
B16	P46061	RAGP1_MOUSE	Ran GTPase-activating protein 1	-1.48	0.024	55	64090	3	R.QVEVINFGDCLVR.S	-13.57	1
B17	O08709	PRDX6_MOUSE	Peroxiredoxin-6	-3.45	0.0035	242	24969	5	R.QVEVINFGDCLVR.S	0.3	1
B18	Q99LS3	SERB_MOUSE	Phosphoserine phosphatase	-2.39	0.00022	207	25308	5	R.NVQVFLISGGFR.S	-3.87	1
B19	Q80UW8	RPAB1_MOUSE	DNA-directed RNA polymerases Ⅰ,Ⅱ,and Ⅲ subunit RPABC1	-2.73	0.025	51	24669	1	R.NVQVFLISGGFR.S	-8	1
B20	P58044	IDI1_MOUSE	Isopentenyl-diphosphate Delta-isomerase 1	-4.11	1.9e-05	175	26615	2	K.WWDNLNHLSPFVDHEK.I	-6.98	1
B21	O70591	PFD2_MOUSE	Prefoldin subunit 2	-1.61	0.028	83	16581	1	K.GAVSAEQVIAGFNR.L	-3.48	1
B22	O88848	ARL6_MOUSE	ADP-ribosylation factor-like protein 6	-2.33	0.0031	58	21117	4	R.LLAEHPPHLTPGIR.E	-6.18	1
	a "A" stands for identified proteins which are upregulated and "B"stands for identified proteins which are downregulated in A20-mCD99L2- vs A20-CTR
	b Ratio of normalized spot intensitybetween A20-mCD99L2- vs A20-CTR
